# Supplementary material for: Effect of oxidative treatment on the secondary structure of decoloured bloodmeal
Source: Royal Society of Chemistry journal article supplement (doi:10.1039/c4ra03890h), 2014-01-01
Supplement: c4ra03890h1.pdf [file c4ra03890h1.pdf]

**Table 2:** Summary of basic statistics for bloodmeal (BM) before and after decolouring (DBM) with peracetic acid (PAA), hydrogen peroxide (HP) or HP with acetic acid (HP/AA). Student T-tests were performed comparing the perimeter and core to the total average and the perimeter and the core to each other. Statistically significant ( $p < 0.05$ ) results are highlighted.

| Sample            | $\alpha$ -helices |           |        | $\beta$ -turns |           |        | random coils |           |        | $\beta$ -sheets |           |        | disordered structures |           |        |
|-------------------|-------------------|-----------|--------|----------------|-----------|--------|--------------|-----------|--------|-----------------|-----------|--------|-----------------------|-----------|--------|
|                   | Av.               | Std. dev. | t-test | Av.            | Std. dev. | t-test | Av.          | Std. dev. | t-test | Av.             | Std. dev. | t-test | Av.                   | Std. dev. | t-test |
| <b>Bloodmeal</b>  |                   |           |        |                |           |        |              |           |        |                 |           |        |                       |           |        |
| Total             | 0.19              | 0.04      |        | 0.15           | 0.04      |        | 0.20         | 0.06      |        | 0.46            | 0.06      |        | 0.34                  | 0.07      |        |
| Perimeter average | 0.19              | 0.05      | 0.27   | 0.15           | 0.05      | 0.31   | 0.19         | 0.08      | 0.57   | 0.47            | 0.07      | 0.51   | 0.34                  | 0.09      | 0.96   |
| Core average      | 0.20              | 0.03      | 0.20   | 0.15           | 0.04      | 0.28   | 0.19         | 0.04      | 0.46   | 0.47            | 0.05      | 0.44   | 0.34                  | 0.05      | 0.95   |
| Perimeter vs Core |                   |           | 0.04   |                |           | 0.07   |              |           | 0.29   |                 |           | 0.23   |                       |           | 0.93   |
| <b>1% PAA</b>     |                   |           |        |                |           |        |              |           |        |                 |           |        |                       |           |        |
| Total             | 0.16              | 0.05      |        | 0.15           | 0.06      |        | 0.20         | 0.07      |        | 0.49            | 0.09      |        | 0.35                  | 0.08      |        |
| Perimeter average | 0.16              | 0.05      | 0.26   | 0.16           | 0.06      | 0.08   | 0.21         | 0.08      | 0.00   | 0.47            | 0.09      | 0.00   | 0.37                  | 0.09      | 0.00   |
| Core average      | 0.17              | 0.05      | 0.25   | 0.14           | 0.05      | 0.03   | 0.18         | 0.06      | 0.00   | 0.51            | 0.07      | 0.00   | 0.32                  | 0.07      | 0.00   |
| Perimeter vs Core |                   |           | 0.00   |                |           | 0.00   |              |           | 0.00   |                 |           | 0.00   |                       |           | 0.00   |
| <b>2% PAA</b>     |                   |           |        |                |           |        |              |           |        |                 |           |        |                       |           |        |
| Total             | 0.15              | 0.04      |        | 0.15           | 0.05      |        | 0.20         | 0.07      |        | 0.49            | 0.08      |        | 0.36                  | 0.08      |        |
| Perimeter average | 0.15              | 0.04      | 0.90   | 0.15           | 0.05      | 0.68   | 0.24         | 0.08      | 0.00   | 0.47            | 0.08      | 0.01   | 0.38                  | 0.08      | 0.01   |
| Core average      | 0.15              | 0.04      | 0.73   | 0.15           | 0.05      | 0.92   | 0.18         | 0.06      | 0.00   | 0.52            | 0.07      | 0.00   | 0.33                  | 0.07      | 0.00   |
| Perimeter vs Core |                   |           | 0.69   |                |           | 0.75   |              |           | 0.00   |                 |           | 0.00   |                       |           | 0.00   |
| <b>3% PAA</b>     |                   |           |        |                |           |        |              |           |        |                 |           |        |                       |           |        |
| Total             | 0.17              | 0.03      |        | 0.15           | 0.04      |        | 0.19         | 0.07      |        | 0.49            | 0.06      |        | 0.34                  | 0.06      |        |
| Perimeter average | 0.17              | 0.04      | 0.43   | 0.15           | 0.04      | 0.81   | 0.21         | 0.08      | 0.00   | 0.47            | 0.06      | 0.00   | 0.36                  | 0.07      | 0.00   |
| Core average      | 0.17              | 0.03      | 0.41   | 0.15           | 0.04      | 0.81   | 0.17         | 0.05      | 0.00   | 0.51            | 0.04      | 0.00   | 0.32                  | 0.05      | 0.00   |
| Perimeter vs Core |                   |           | 0.17   |                |           | 0.68   |              |           | 0.00   |                 |           | 0.00   |                       |           | 0.00   |
| <b>4% PAA</b>     |                   |           |        |                |           |        |              |           |        |                 |           |        |                       |           |        |
| Total             | 0.16              | 0.04      |        | 0.18           | 0.05      |        | 0.20         | 0.07      |        | 0.46            | 0.08      |        | 0.38                  | 0.07      |        |
| Perimeter average | 0.17              | 0.05      | 0.04   | 0.18           | 0.05      | 0.76   | 0.21         | 0.08      | 0.18   | 0.44            | 0.08      | 0.02   | 0.39                  | 0.09      | 0.33   |
| Core average      | 0.15              | 0.03      | 0.00   | 0.18           | 0.05      | 0.70   | 0.19         | 0.06      | 0.07   | 0.48            | 0.06      | 0.00   | 0.37                  | 0.07      | 0.15   |
| Perimeter vs Core |                   |           | 0.00   |                |           | 0.55   |              |           | 0.01   |                 |           | 0.00   |                       |           | 0.04   |
| <b>5% PAA</b>     |                   |           |        |                |           |        |              |           |        |                 |           |        |                       |           |        |
| Total             | 0.17              | 0.04      |        | 0.18           | 0.05      |        | 0.22         | 0.07      |        | 0.43            | 0.06      |        | 0.39                  | 0.07      |        |
| Perimeter average | 0.18              | 0.04      | 0.00   | 0.17           | 0.05      | 0.01   | 0.23         | 0.07      | 0.00   | 0.42            | 0.07      | 0.00   | 0.40                  | 0.08      | 0.01   |
| Core average      | 0.16              | 0.03      | 0.00   | 0.18           | 0.04      | 0.01   | 0.20         | 0.06      | 0.09   | 0.45            | 0.05      | 0.13   | 0.39                  | 0.06      | 0.83   |
| Perimeter vs Core |                   |           | 0.00   |                |           | 0.00   |              |           | 0.00   |                 |           | 0.00   |                       |           | 0.01   |
| <b>HP</b>         |                   |           |        |                |           |        |              |           |        |                 |           |        |                       |           |        |
| Total             | 0.14              | 0.06      |        | 0.17           | 0.06      |        | 0.17         | 0.09      |        | 0.52            | 0.11      |        | 0.34                  | 0.10      |        |
| Perimeter average | 0.15              | 0.06      | 0.06   | 0.17           | 0.06      | 0.19   | 0.17         | 0.09      | 0.44   | 0.51            | 0.12      | 0.29   | 0.34                  | 0.11      | 0.94   |
| Core average      | 0.14              | 0.06      | 0.10   | 0.16           | 0.06      | 0.23   | 0.18         | 0.08      | 0.42   | 0.52            | 0.10      | 0.34   | 0.34                  | 0.09      | 1.00   |
| Perimeter vs Core |                   |           | 0.00   |                |           | 0.02   |              |           | 0.17   |                 |           | 0.06   |                       |           | 0.89   |
| <b>HP /AA</b>     |                   |           |        |                |           |        |              |           |        |                 |           |        |                       |           |        |
| Total             | 0.17              | 0.04      |        | 0.13           | 0.05      |        | 0.23         | 0.09      |        | 0.43            | 0.07      |        | 0.39                  | 0.08      |        |
| Perimeter average | 0.17              | 0.05      | 0.94   | 0.15           | 0.06      | 0.60   | 0.24         | 0.11      | 0.02   | 0.44            | 0.08      | 0.02   | 0.40                  | 0.10      | 0.00   |
| Core average      | 0.18              | 0.03      | 0.32   | 0.13           | 0.04      | 0.11   | 0.25         | 0.07      | 0.00   | 0.44            | 0.05      | 0.00   | 0.38                  | 0.06      | 0.24   |
| Perimeter vs Core |                   |           | 0.15   |                |           | 0.03   |              |           | 0.75   |                 |           | 0.48   |                       |           | 0.08   |
